# Supplementary material for: Analysis and Interpretation of Automated Blood Count in the Treatment of Chronic Paracoccidioidomycosis
Source: Preprints.org preprint supplement (doi:10.20944/preprints202403.0837.v1), 2024-03-18
Supplement: Supplementary file 3 [file supplementary]

**Supplementary Table S1.** Hematological parameters analyzed and reference normal values.

| **Hematological parameters** | **Reference values** |
| --- | --- |
| **Red series parameters *** |  |
| Total erythrocyte count |  |
| Males | 4.5 to 6.5 millions/mm³ |
| Females | 3.9 to 5.6 millions/mm³ |
| Hemoglobin (Hb) |  |
| Males | 13.5 to 17.5 g/dL |
| Females | 11.5 to 15.5 g/dL |
| Hematocrit (Hct) |  |
| Males | 40 to 52% |
| Females | 36 to 48% |
| Mean hemoglobin corpuscular volume (MCV) | 80 to 95 fL |
| Mean hemoglobin concentration (MCH) | 27 to 34 pg |
| Mean cell hemoglobin concentration (MCHM) | 30 to 35 g/dL |
| **White series parameters *** |  |
| Total leukocyte count | 4,000 to 11,000/mm³ |
| Neutrophils | 1,800 to 7,500/mm³ |
| Lymphocytes | 1,500 to 3,500/mm³ |
| Monocytes | 200 to 880/mm³ |
| Eosinophils | 40 to 440/mm³ |
| Basophils | 10 to 100/mm³ |
| **Platelet parameter** | 150 to 400 x103/mm³ |
| **Cell immaturity parameters #** |  |
| Immature granulocytes (IG)%; (IG) | 0 to 0.6%; 0 to 0.06 x103/µL |
| Reticulocytes (Ret)% | 0.5 to 2.5% |
| Reticulocyte hemoglobin content (Ret-He) | 28 to 36 pg |
| Fraction of immature reticulocytes (IRF) | 1.6 to 10.5% |
| Source: **#** [12] **Pekelharing et al., 2010 *Hoffbrand et al., 2020** | |

**Supplementary Table S2.** Evaluation of the blood red cells, white blood cells count (in number per cubic millimeter) and platelets count before treatment and its progress after introduction of the antifungal treatment.

| **Variable** | **Patients**  **(number)** | **S0**  **Median [Q1;Q3]** | **S1**  **Median [Q1;Q3]** | **S2**  **Median [Q1;Q3]** | **S3**  **Median [Q1;Q3]** | ***p* value** |
| --- | --- | --- | --- | --- | --- | --- |
| **Red blood series** | | | | | | |
| Erythrocytes | 55 | 4.7  [4.3; 5.1] | ... | 4.8  [4.5; 5.4] | ... | **0.001** |
| Erythrocytes | 29 | 4.7  [4.4; 5.1] | 4.7  [4.4; 5.2] | 4.8  [4.5; 5.1] | 4.8  [4.4; 5.3] | 0.196 |
| Hemoglobin | 55 | 13.7  [12.1; 14.9] | ... | 14.6  [13.6; 15.6] | ... | **<0.001** |
| Hemoglobin | 29 | 13.9  [13.2; 14.8] cd | 14.1  [13.5; 15.3] bc | 14.6  [13.9; 15.2] b | 15.1  [14.0; 16.1] a | **<0.001** |
| Hematocrit | 55 | 42.1  [36.8; 45.6] | ... | 44.2  [40.5; 47.2] | ... | **<0.001** |
| Hematocrit | 29 | 42.2  [38.6; 45.0] bc | 42.5  [40.7; 44.7] b | 44.3  [41.4; 45.7] ab | 44.8  [41.5; 48.1] a | **0.009** |
| MCV | 55 | 89.9  [86.7; 91.9] | ... | 90.0  [88.3; 94.1] | ... | **0.004** |
| MCV | 29 | 89.3  [87.0; 91.3] c | 89.4  [86.6; 93.3] c | 90.4  [88.8; 94.2] ab | 90.9  [89.4; 94.5] a | **<0.001** |
| MHC | 55 | 29.6  [28.0; 30.8] | ... | 30.3  [29.2; 31.6] | ... | **<0.001** |
| MHC | 29 | 29.6  [27.8; 31.3] cb | 29.4  [28.5; 31.4] bc | 30.3  [29.2; 31.7] ab | 31.2  [29.7; 32.5] a | **0.003** |
| CMHC | 55 | 33.1  [32.0; 33.8] | ... | 33.5  [32.6; 34.2] | ... | **0.006** |
| CMHC | 29 | 33.1  [32.2; 34.0] | 33.4  [32.5; 33.8] | 33.3  [32.7; 33.9] | 33.8  [32.6; 34.4] | 0.313 |
| RDWsd | 22 | 47.0  [44.0; 49.8] | ... | 46.3  [45.0; 48.0] | ... | 0.984 |
| RDWsd | 07 | 46.0  [44.0; 48.6] | 49.0  [46.0; 53.0] | 47.0  [45.8; 51.0] | 46.0  [44.0; 50.5] | 0.398 |
| RDWcv | 22 | 14.2  [13.6; 15.5] | ... | 14.0  [13.1; 14.8] | ... | 0.465 |
| RDWcv | 07 | 13.7  [13.3; 14.3] | 14.2  [14.1; 15.1] | 13.4  [13.1; 14.9] | 13.7  [12.6; 14.3] | 0.239 |
| **White blood series** | | | | | | |
| Leukocytes | 55 | 8200  [7000; 10230] | ... | 7460  [6380; 8885] | ... | **0.007** |
| Leukocytes | 29 | 8150  [6910; 10260] | 7970  [5930; 9820] | 7640  [6410; 8700] | 7570  [6480; 10080] | 0.113 |
| Neutrophils | 55 | 5062  [4199; 6337] | ... | 4422  [3350; 5491] | ... | **0.002** |
| Neutrophils | 29 | 4821  [4215; 6102] | 4303  [3683; 5355] | 4422  [3305; 5366] | 4350  [3318; 5734] | 0.161 |
| Eosinophils | 55 | 222  [79.5; 448] | ... | 224  [130; 430] | ... | 0.897 |
| Eosinophils | 29 | 229  [72.7; 681] | 357  [143; 565] | 196  [147; 622] | 234  [102; 455] | 0.661 |
| Basophils | 55 | 0.00  [0.0; 59.1] | ... | 0.00  [0.0; 72.3] | ... | 0.071 |
| Basophils | 29 | 0.0  [0.0; 63.7] | 0.0  [0.0; 63.0] | 44.4  [0.0; 76.0] | 0.0  [0.0; 64.0] | 0.761 |
| Lymphocytes | 55 | 1997  [1493; 2664] | ... | 2197  [1665; 2640] | ... | 0.158 |
| Lymphocytes | 29 | 1956  [1582; 2548] | 2135  [1648; 2630] | 2113  [1654; 2653] | 1995  [1544; 2554] | 0.338 |
| Monocytes | 55 | 718  [525; 990] | ... | 548  [423; 787] | ... | **<0.001** |
| Monocytes | 29 | 718  [565; 953]a | 717  [367;829]ac | 549  [420; 771]bc | 550  [515; 813]c | **0.004** |
| NRL | 55 | 2.6  [1.8; 3.5] | ... | 2.0  [1.5; 3.2] | ... | **0.004** |
| NRL | 29 | 2.5  [1.6; 3.2] | 2.1  [1.6; 2.6] | 2.1  [1.5; 3.2] | 2.1  [1.5; 3.0] | 0.392 |
| MLR | 55 | 0.4  [0.2; 0.5] | ... | 0.3  [0.2; 0.4] | ... | **<0.001** |
| MLR | 29 | 0.39  [0.26; 0.48] a | 0.31  [0.22; 0.41] ab | 0.28  [0.21; 0.41]b | 0.31  [0.25; 0.40] ab | **0.042** |
| **Platelet series** | | | | | | |
| Platelets | 55 | 322  [259; 403] | ... | 263  [220; 303] | ... | **<0.001** |
| PLR | 55 | 0.2  [0.1; 0.3] | ... | 0.1  [0.1; 0.2] | ... | **<0.001** |
| Platelets | 29 | 304  [256; 402] a | 268  [228; 306]bcd | 242  [211; 298] cd | 258  [209; 295] d | **< 0.001** |
| PLR | 29 | 0.2  [0.1-0.2]a | 0.1  [0.1-0.2]bcd | 0.1  [0.1-0.1]cd | 0.1  [0.1-0.1]d | **0.002** |

Results presented as; median [Q1: first quartile; Q3: third quartile]; MCV: mean hemoglobin corpuscular volume; MCH: mean hemoglobin concentration; CHCM: mean corpuscular hemoglobin concentration; RDWsd: range of distribution of erythrocytes - expressed as standard deviation; RDWcv: range of distribution of erythrocytes - expressed as coefficient of variation; NLR: neutrophil/lymphocyte ratio; MLR: monocyte/lymphocyte ratio; PLR: platelet/lymphocyte ratio; Platelet count: number x103/cubic millimeter; S0 – before treatment; S1 - between the beginning of treatment and after clinical improvement; S2 - clinical cure; S3 - serological cure.

Statistical tests: Wilcoxon W test or paired Student's T test; Friedman test – post hoc (Durbin-Conover). Lower-case letters compare medians in the same row; medians followed by different letters are statistically different (p≤0.05), while followed by the same letter or not followed by any letter do not differ (p>0.05).
